# Supplementary material for: The Extent of Intracellular Accumulation of Bilirubin Determines Its Anti- or Pro-Oxidant Effect
Source: MDPI journal article supplement (doi:10.3390/ijms21218101), 2020-10-30
Supplement: s1 [file s1]

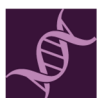

Supplementary Materials

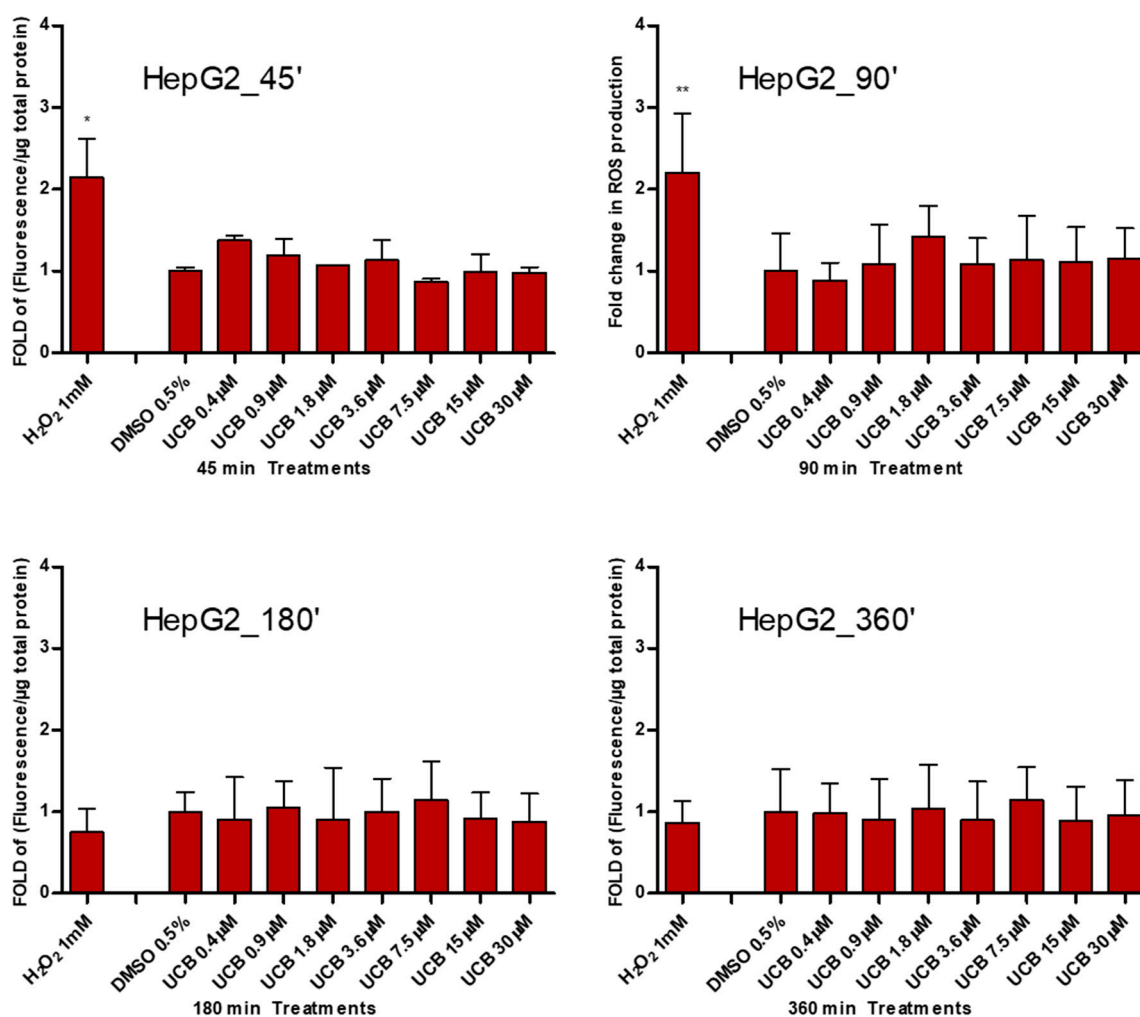

**Figure S1.** Time course of the effect of UCB treatment on intracellular ROS production in HepG2 cells. HepG2 cells were exposed to increasing UCB concentration (from 0.4 to 30  $\mu$ M in the presence of 30  $\mu$ M BSA) or 0.5% DMSO for the time indicated on x-axis. Exposure to 1 mM H<sub>2</sub>O<sub>2</sub> was used as positive control. Fluorescence results reflecting ROS production were normalized the total protein content and compared to DMSO-treated cells. Data are expressed as mean $\pm$ SD of three independent experiments. \* $p$ <0.05, \*\* $p$ <0.01.

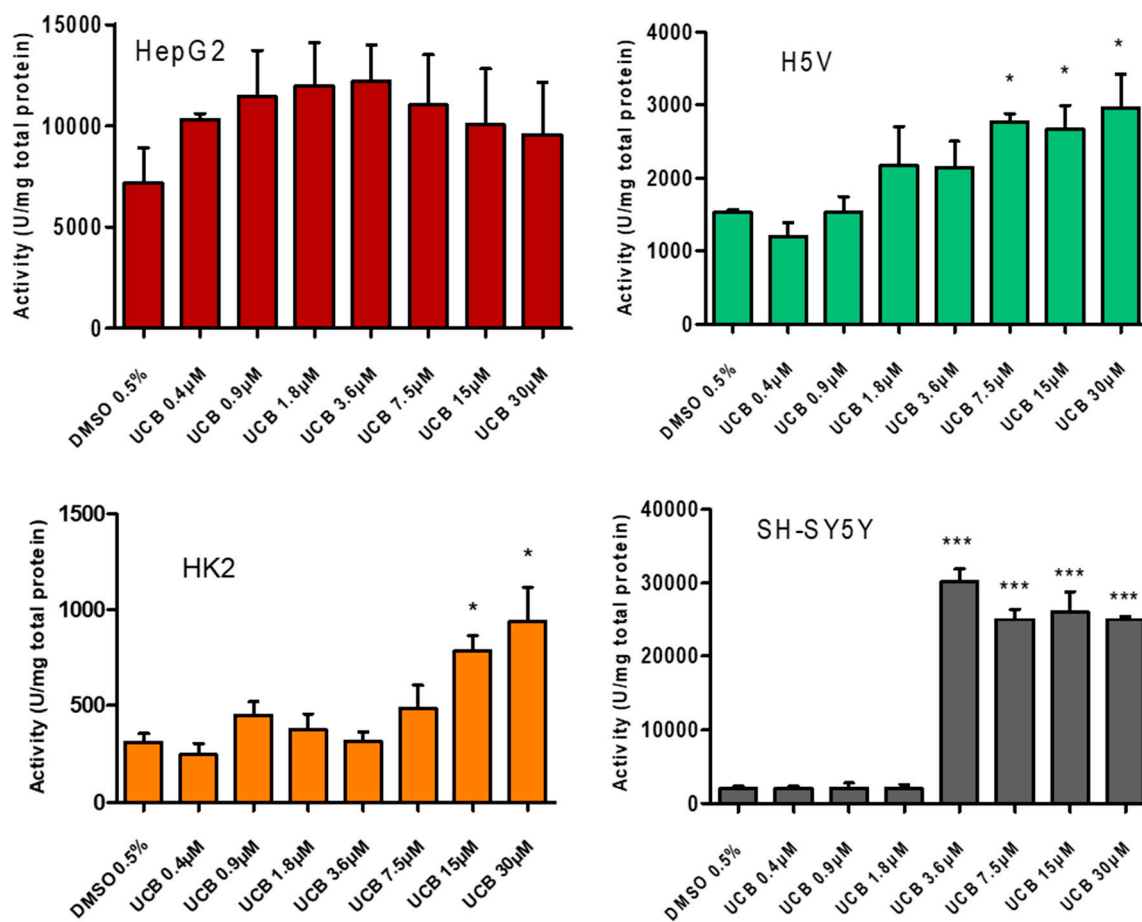

**Figure S2. The effect of UCB exposure on SOD activity.** The cell lines were exposed to the increasing UCB concentrations (from 0.4 to 30  $\mu$ M in the presence of 30  $\mu$ M BSA) or 0.5% DMSO for 24 h and then SOD activity was measured. Data are expressed as mean $\pm$ SD of three independent experiments. \* $p$ <0.05, \*\* $p$ <0.01, \*\*\* $p$ <0.001.
